# Supplementary material for: The CXCL12gamma chemokine immobilized by heparan sulfate on stromal niche cells controls adhesion and mediates drug resistance in multiple myeloma
Source: Springer Nature journal article supplement (doi:10.1186/s13045-021-01031-3), 2021-01-12

## Supplemental material

**Supplemental table 1: qPCR primer sequence**

|                         |                        |
|-------------------------|------------------------|
| CXCL12 $\alpha$ forward | CCAAACTGTGCCCTTCAGAT   |
| CXCL12 $\alpha$ reverse | CGTCTTTGCCCTTTCATCTC   |
| CXCL12 $\gamma$ forward | CCAAACTGTGCCCTTCAGAT   |
| CXCL12 $\gamma$ reverse | CTTTTCTGGGCAGCCTTTCT   |
| RPLPO forward           | GCTTCCTGGAGGGTGTCCGC   |
| RPLPO reverse           | TCCGTCTCCACAGACAAGGCCA |

### Supplemental figure legends

**Figure 1.** CXCL12 $\alpha$  mRNA expression in HS5-WT and HS5-CXCL12 $\gamma$  KO cells. A representative for 2 independent experiments. ns,  $P > 0.05$  using unpaired student's t-test.

**Figure 2.** MTT assay analysis of the growth of HS5-WT, HS5-CXCL12 $\gamma$ KO and HS5-EXT1KO cells. Mean  $\pm$ SD of three independent experiments in triplicate is shown.

**Figure 3. (A)** Adhesion of the HMCL L363 to HS5-WT and two HS5-CXCL12 $\gamma$ KO clones. Mean  $\pm$ SD of three independent experiments in triplicate. \*,  $P \leq 0.05$  using one-way ANOVA analysis. **(B)** Adhesion of the HMCL L363 to HS5-WT and HS5-EXT1KO. Mean  $\pm$ SD of 3 independent experiments in triplicate. \*,  $P \leq 0.05$  using unpaired student's t-test.

**Figure 4. (A)** Flow cytometric discrimination of MM cells from BMSCs expressing GFP. **(B)** BMSC viability is not affected by bortezomib. HS5 cells were co-cultured with XG1 cells in the presence of bortezomib at indicated concentrations for 3 days. HS5 viability was analyzed by flow cytometry.

**Figure 5.** CXCL12 $\gamma$  mediates carfilzomib resistance in XG1 cells. XG1 was cultured alone, or co-cultured with HS5-WT, HS5-CXCL12 $\gamma$ KO or HS5-EXT1KO, in the presence carfilzomib for 3 days. Mean  $\pm$ SD of 3 independent experiments in triplicate. \*,  $P \leq 0.05$ ; \*\*,  $P \leq 0.01$  using one-way ANOVA analysis.

**Figure 6.** Recombinant CXCL12 $\gamma$  (or CXCL12 $\alpha$ ) induced adhesion to VCAM-1 does not protect HMCLs from bortezomib-induced cell death. The HMCLs XG1 or MM1.S were cultured on a surface co-coated with CXCL12 $\gamma$  or CXCL12 $\alpha$  and VCAM-1 in the presence

of bortezomib for 3 days. Cell viability was analyzed by flow cytometry. A representative plot for 2 independent experiment is shown.

# Supplemental data

## Figure 1

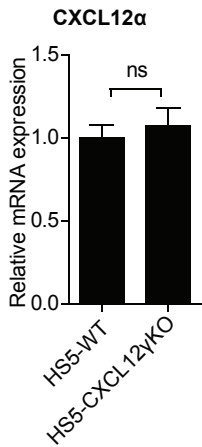

## Figure 2

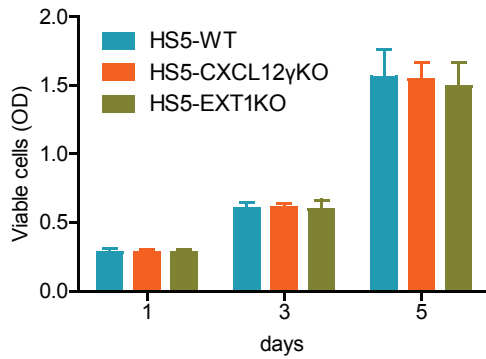

## Figure 3

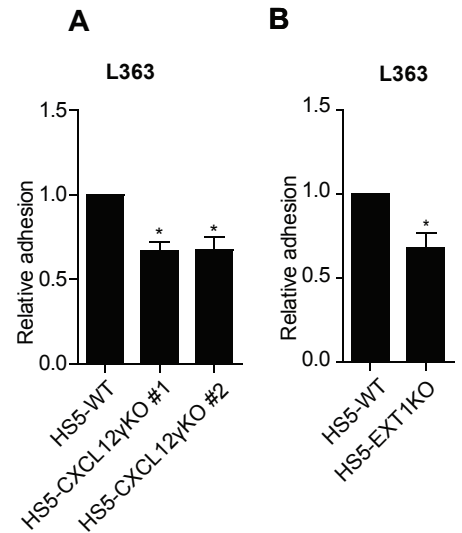

## Figure 4

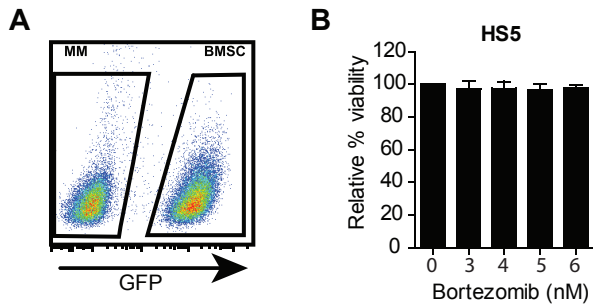

## Figure 5

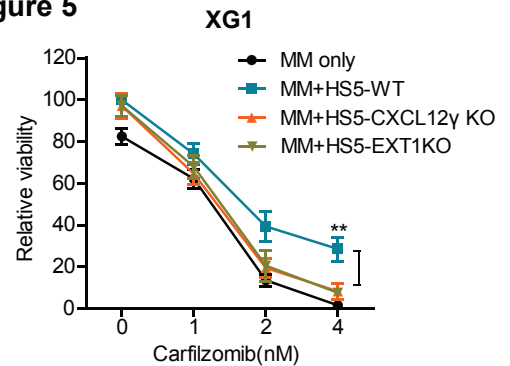

## Figure 6

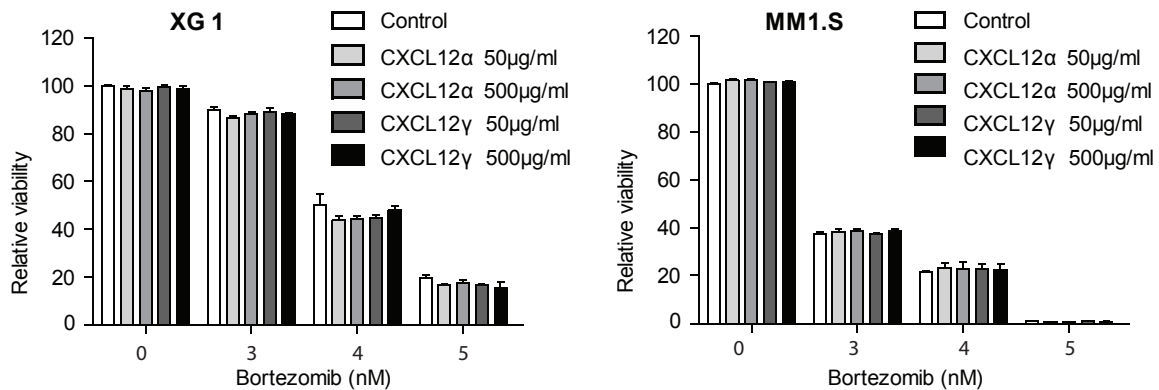

Supplement: MOESM1 [file 18762362]
